# Supplementary material for: An integrative systematic revision and biogeography of Rhynchocalamus snakes (Reptilia, Colubridae) with a description of a new species from Israel
Source: PubMed Central journal article supplement (PMC5183090; doi:10.7717/peerj.2769), 2016-12-22

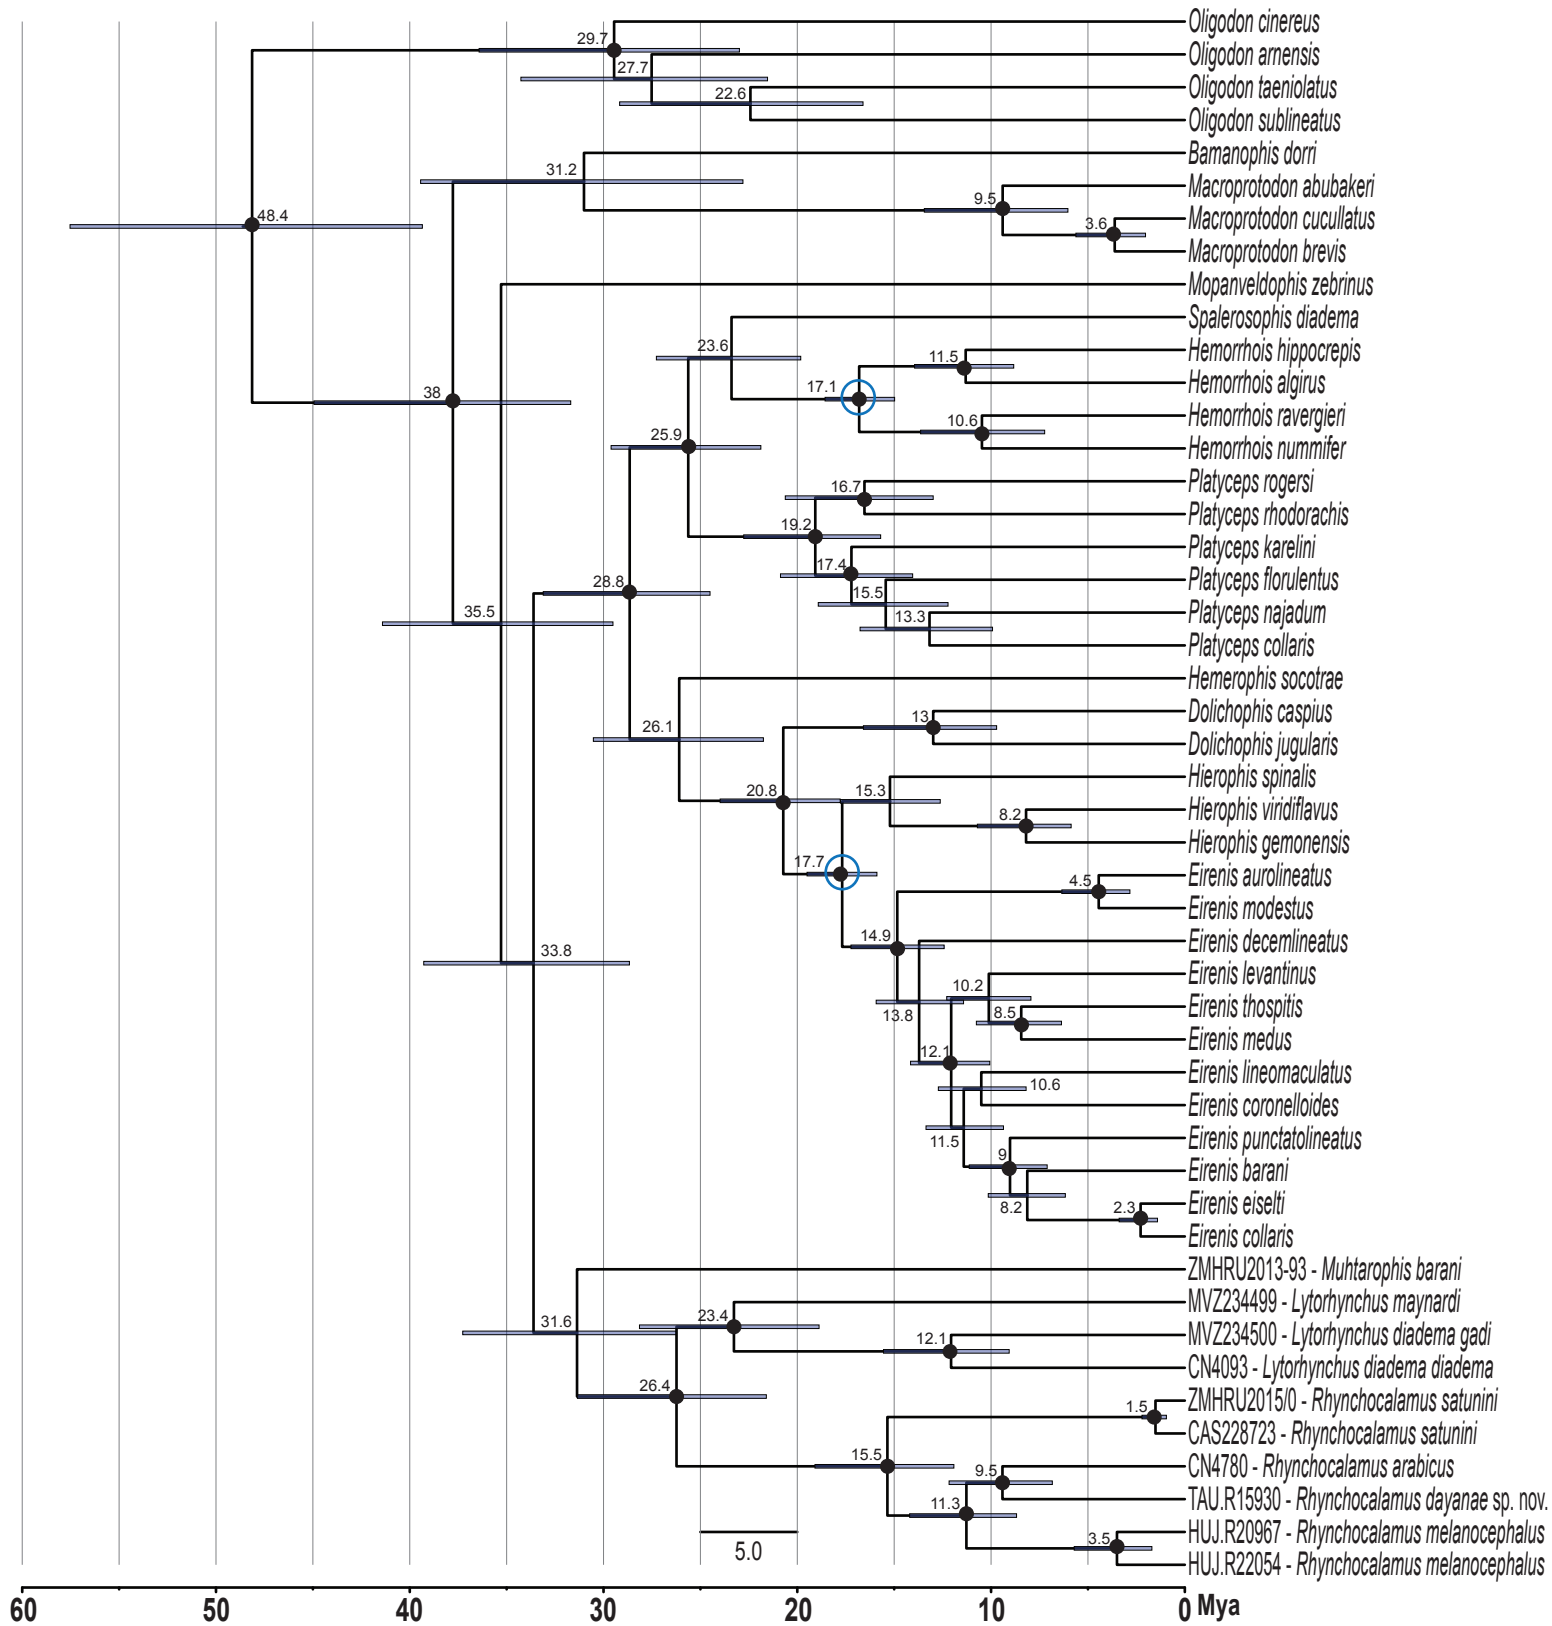

Supplement: peerj-04-2769-s007.pdf [file peerj-04-2769-s007.pdf]
