# Supplementary material for: An integrative systematic revision and biogeography ofRhynchocalamussnakes (Reptilia, Colubridae) with a description of a new species from Israel
Source: PeerJ journal article supplement (doi:10.7717/peerj.2769), 2016-12-22

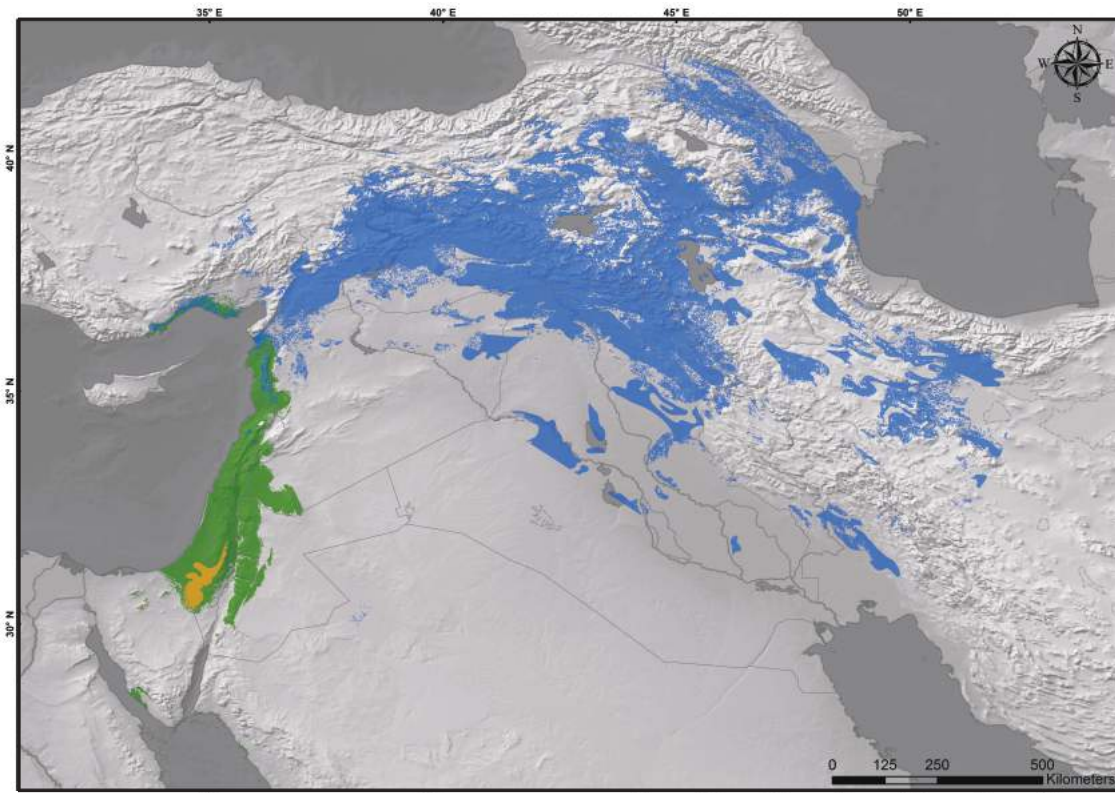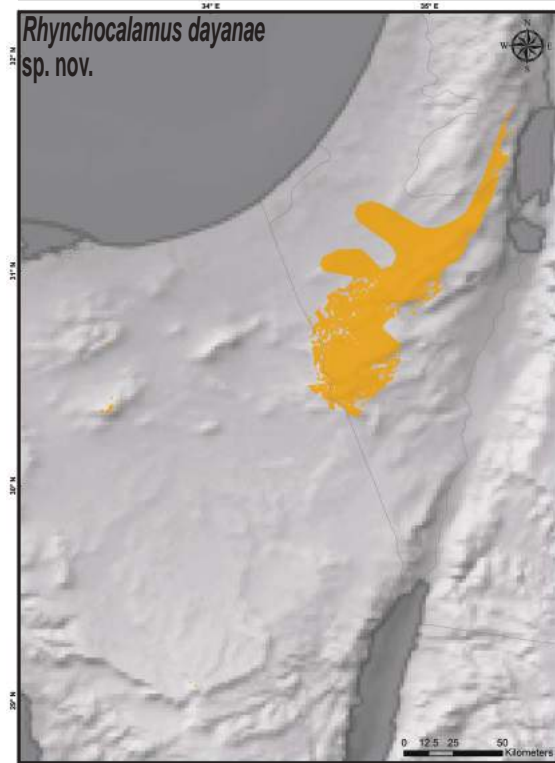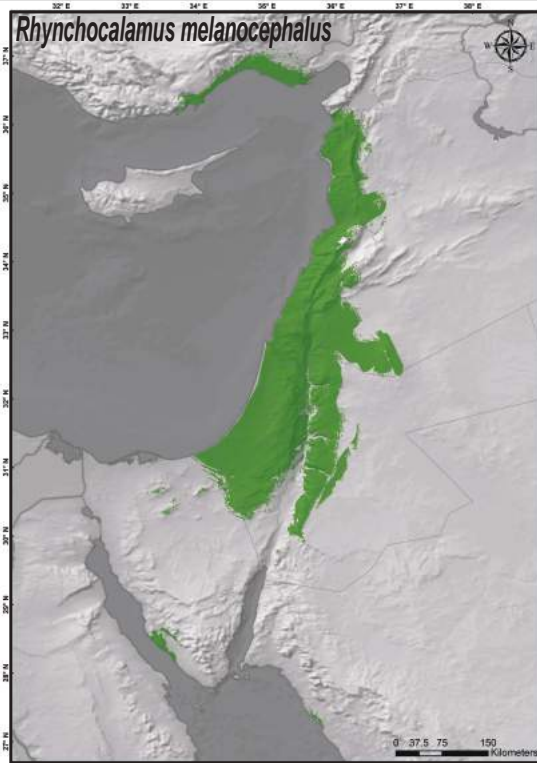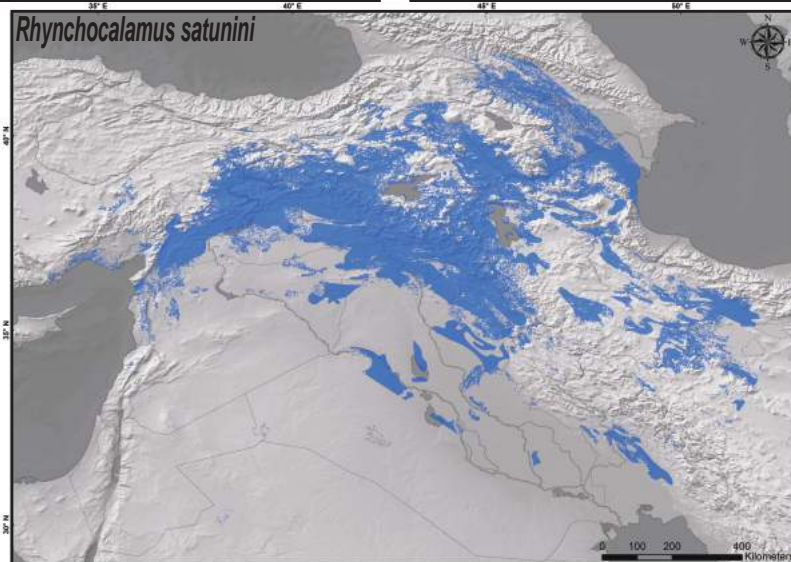

Supplement: Supplemental_Figure_S4.pdf [file Supplemental_Figure_S4.pdf]
