# Supplementary material for: An integrative systematic revision and biogeography of Rhynchocalamus snakes (Reptilia, Colubridae) with a description of a new species from Israel
Source: PeerJ. 2016 Dec 22;4:e2769. doi: 10.7717/peerj.2769 (PMC5183090; doi:10.7717/peerj.2769)
Supplement: Table S3 — Taxon names correspond to changes proposed in this paper. Specimens used in the genetic analyses (genetic; n = 26) are presented in Fig. 1. (*) Specimens of R. melanocephalus from the Negev region in Israel (n = 9). Dataset of the mensural characters is presented in millimetres. Meristic characters are presented with the left/right sides. Character and museum abbreviations are listed in the Material and Methods section. [file peerj-04-2769-s003.xlsx]

## Sheet: Supplemental Table S3
SPECIES	SPECIMEN CODE	GENETIC	SOURCE	COUNTRY	LOCALITY	AGE	SEX	SVL	TL	PilL	RL	RH	RW	FL	FW	PL	PW	IntNL	PFL	EYE	BPL	InD	AimL	PimL	PreO L/R	PostO L/R	TS L/R	PTS L/R	LS L/R	VS	SCS	UL L/R	LL L/R	BDS	InfLC L/R	GSI	GS	DST	34UL	IntN
R. arabicus	CN4780	1	Šmíd et al. (2015)	Oman	Wadi Ayun, Dhofar	A	NA	289	NA	NA	NA	NA	NA	NA	NA	NA	NA	NA	NA	NA	NA	NA	NA	NA	1/1	1/1	1/1	1/1	1/1	NA	71	6/6	NA	NA	NA	NA	NA	12	enlarged	trapezoid
R. arabicus	FMNH18219 (HOLOTYPE)		Schmidt (1933) + Photographs	Yemen	Aden	A	F	278	49	NA	NA	NA	NA	NA	NA	NA	NA	NA	NA	NA	NA	NA	NA	NA	1/1	1/1	1/1	1/1	1/1	240	81	6/6	8/8	NA	NA	NA	NA	13	Large	Triangle
R. dayanae sp.nov.	HUJ21704 (HOLOTYPE)	5	This study	Israel	Road no. 40 near Nafha prison	A	M	259.8	59.2	7.05	1.42	1.15	1.79	2.66	2.02	3.11	3.73	0.41	0.78	1.31	16.32	1.32	2.04	1.84	1/1	2/1	1/1	1/1	1/1	201	62	6/6	8/8	12	4/4	2	3	11	Large	Triangle
R. dayanae sp.nov.	HUJ21705 (PARATYPE)	4	This study	Israel	Road no. 171	A	M	432.1	89.5	8.18	1.28	NA	NA	3.18	2.84	3.85	NA	0.61	0.71	NA	22.95	NA	NA	NA	1/1	2/2	1/1	2/1	1/1	229	60	6/6	-/8	16	4/4	2	3	12	Large	Trapezoid
R. dayanae sp.nov.	HUJ22021		This study	Israel	Road no. 40: Mizpe Ramon quarries	A	F	278.8	59.2	7.61	1.41	1.11	1.94	2.46	2.39	3.41	4.11	0.66	0.62	1.36	17.91	1.52	2.35	1.57	1/1	2/2	1/1	1/1	1/1	188	58	6/6	8/8	14	4/4	2	3	12	Large	Trapezoid
R. dayanae sp.nov.	HUJ22023		This study	Israel	Road no. 171	A	M	399.1	69.7	8.48	1.92	1.39	2.88	2.97	2.76	3.86	4.71	0.41	0.76	1.61	20.22	2.11	2.64	1.92	1/1	2/2	1/1	1/1	1/1	204	58	6/6	8/8	14	4/4	2	3	10	Large	Triangle
R. dayanae sp.nov.	TAU15930 (PARATYPE)	2	This study	Israel	Road no. 10, Nahal Batur	A	M	384.7	94.1	8.82	1.59	1.66	2.08	2.84	2.73	3.77	4.17	0.68	0.92	1.61	19.81	1.75	2.59	1.79	1/1	2/2	1/1	1/1	1/1	218	62	6/6	8/-	12	4/4	2	3	11	Large	Trapezoid
R. dayanae sp.nov.	TAU17093 (PARATYPE)	3	This study	Israel	Mitzpe Ramon	SA	M	213.1	47.1	6.92	1.39	1.58	1.81	2.46	2.32	3.21	4.09	0.33	0.59	1.21	13.62	1.71	2.27	NA	1/1	2/1	1/1	1/1	1/1	198	54	6/6	-/8	10	4/4	NA	NA	10	Large	Trapezoid
R. melanocephalus	BMNH1246.1.3.29		Photographs	Israel	Merom	A	F	NA	NA	NA	NA	NA	NA	NA	NA	NA	NA	NA	NA	NA	NA	NA	NA	NA	1/1	1/1	1/1	1/2	1/1	218	55	6/6	7/7	6	3/3	1	4	10	Large	Triangle
R. melanocephalus	CAS147592		Photographs	Jordan	Azraq, Zarqa	A	NA	NA	NA	NA	NA	NA	NA	NA	NA	NA	NA	NA	NA	NA	NA	NA	NA	NA	1/1	1/1	1/1	1/1	1/1	NA	NA	6/6	7/7	12	3/4	2	5	15	Large	Triangle
R. melanocephalus	HUJ16302		This study	Israel	Gamla	A	M	378.5	109.1	9.34	1.95	1.81	2.85	3.54	2.86	4.21	5.74	0.28	0.55	1.53	15.09	2.56	2.74	2.28	1/1	1/1	1/1	2/3	1/1	186	66	6/6	7/7	7	4/4	2	4	11	Large	Triangle
R. melanocephalus	HUJ16380		This study	Israel	Wadi Lotem: Bet Sefer Reali	A	M	350.9	81.2	8.46	1.52	1.59	2.46	3.11	2.65	3.84	5.21	0.45	0.49	1.51	14.81	2.28	2.34	1.67	1/1	1/1	1/1	2/2	1/1	183	55	6/6	7/7	8	3/3	1	4	11	Equal	Trapezoid
R. melanocephalus	HUJ16394		This study	Israel	Jerusalem, near Sha'ar Ziyon	A	M	281.3	62.1	6.98	1.19	1.51	1.75	2.77	2.28	3.19	3.98	0.47	0.61	1.19	15.29	1.59	1.57	NA	1/1	1/1	1/1	1/2	1/1	195	59	6/6	7/7	11	3/3	1	5	12	Equal	Trapezoid
R. melanocephalus	HUJ16605		This study	Israel	Mt. Gilo Field School	A	F	347.3	87.8	7.46	1.27	1.38	2.23	2.88	1.99	3.38	3.84	0.35	0.65	1.38	13.12	1.69	1.67	1.45	1/1	1/1	1/1	2/2	1/1	189	61	6/6	7/7	9	3/3	1	4	12	Equal	Trapezoid
R. melanocephalus	HUJ16624		This study	Israel	Nahal 'Ammud	A	NA	NA	NA	7.45	1.27	1.31	2.34	2.74	2.23	3.83	3.98	0.34	0.56	1.21	13.11	1.82	1.84	1.43	1/1	1/1	1/1	2/2	1/1	NA	NA	6/6	7/7	7	3/3	2	5	9	Large	Trapezoid
R. melanocephalus	HUJ16853		This study	Israel	Qiryat Tiv'on	A	F	398.5	92.1	8.54	1.46	1.61	2.72	3.36	2.57	4.11	5.47	0.31	0.45	1.63	14.95	2.41	2.44	1.62	1/1	1/1	1/1	2/2	1/1	178	59	6/6	7/7	6	3/3	2	4	8	Large	Triangle
R. melanocephalus	HUJ16858		This study	Israel	South of HaGolan	A	F	431.8	104.7	8.67	1.36	1.72	2.56	3.24	2.48	4.04	5.45	0.48	1.02	1.62	13.58	2.27	2.18	1.86	1/1	1/1	1/1	1/1	1/1	210	67	6/6	7/7	6	3/3	1	3	10	Equal	Trapezoid
R. melanocephalus	HUJ20861		This study	Israel	Jerusalem, Szold School	A	M	356.5	86.5	7.24	1.28	1.51	2.32	2.75	2.22	3.14	4.09	0.36	0.41	1.41	14.73	1.93	1.91	1.22	1/1	1/1	1/1	2/2	1/1	209	65	6/6	6/7	8	3/3	1	3	11	Large	Triangle
R. melanocephalus	HUJ20967	22	This study	Israel	Mt. Hermon	A	F	461.1	97.5	8.32	1.75	1.73	2.71	3.17	2.43	3.61	4.95	0.38	0.52	1.49	13.76	2.27	1.97	1.61	1/1	1/1	1/1	2/2	1/1	219	63	6/6	7/7	6	3/3	2	5	13	Large	Triangle
R. melanocephalus	HUJ20981		This study	Israel	Mt. Gilbo'a: Qibbuz Merav	A	M	297.4	84.1	7.62	1.47	1.53	2.42	2.89	2.28	3.58	4.43	0.12	0.79	1.31	16.66	2.13	2.01	1.81	1/1	1/1	1/1	2/2	1/1	189	69	6/6	7/7	9	3/3	2	3	11	Large	Triangle
R. melanocephalus	HUJ21001		This study	Israel	Jerusalem: Giv'at Ram HUJ campus	A	M	319.1	91.1	7.98	1.41	1.57	2.22	3.05	2.19	3.71	4.05	0.21	0.59	1.42	15.74	2.21	1.92	1.39	1/1	1/1	1/1	2/2	0/0	205	57	6/6	7/7	9	4/4	1	4	10	Equal	Triangle
R. melanocephalus	HUJ21089		This study	Israel	Mt. Gilloh (Har Gilo)	A	M	261.3	64.1	7.25	1.25	1.39	2.21	2.74	2.44	3.28	4.41	0.41	0.43	1.26	12.68	2.08	1.75	1.13	1/1	1/1	1/1	2/2	1/1	207	47	6/6	7/7	7	4/4	2	4	11	Large	Trapezoid
R. melanocephalus	HUJ21090		This study	Israel	Mt. Gilloh (Har Gilo)	A	F	411.3	77.7	8.18	1.47	1.64	2.22	2.97	2.57	3.69	5.08	0.43	0.41	1.69	16.59	2.12	1.71	1.5	1/1	1/1	1/1	1/1	1/1	221	55	6/6	7/7	9	3/3	2	4	11	Equal	Trapezoid
R. melanocephalus	HUJ21093		This study	Israel	Mt. Gilbo'a: Qibbuz Merav	A	M	388.1	89.3	9.51	1.84	2.26	3.11	3.51	2.75	4.47	5.67	0.44	0.75	1.81	20.46	2.81	2.81	2.11	1/1	1/1	1/1	2/2	1/1	197	51	6/6	7/7	10	4/4	2	4	11	Large	Trapezoid
R. melanocephalus	HUJ21094		This study	Israel	Mt. Gilbo'a: Qibbuz Ma'ale Gilbo'a	A	M	309.5	83.5	8.24	1.48	1.68	2.62	2.89	2.56	3.77	4.81	0.37	0.57	1.74	15.76	2.15	2.41	1.71	1/1	1/1	1/1	2/2	1/1	181	58	0/6	7/7	10	3/3	1	5	11	Large	Triangle
R. melanocephalus	HUJ21241		This study	Israel	West of Ein ha-Mifraz	A	M	463.2	83.1	8.23	1.44	1.49	2.91	2.84	2.62	3.75	5.19	0.66	0.52	1.48	14.29	2.51	1.96	1.88	1/1	1/1	1/1	2/2	1/1	178	56	6/6	7/7	7	3/3	2	6	11	Large	Trapezoid
R. melanocephalus	HUJ21242		This study	Israel	Shiqmim Field Study School	A	M	322.1	72.5	7.73	1.91	1.22	2.59	2.84	2.54	3.29	4.91	0.44	0.62	1.43	13.82	1.98	1.92	1.51	1/1	1/1	1/1	2/2	1/1	201	52	6/6	7/7	9	4/4	2	5	11	Equal	Trapezoid
R. melanocephalus	HUJ21631		This study	Israel	Jerusalem: Zameret Ha-Bira (French Hil)	A	M	389.5	104.5	8.75	1.39	2.53	2.23	3.12	2.52	4.02	5.27	0.41	0.65	1.42	19.18	2.35	NA	NA	1/1	1/1	1/1	2/2	0/0	193	68	6/6	7/-	11	4/4	NA	4	11	Equal	Triangle
R. melanocephalus	HUJ21833 *	9	This study	Israel	Exit from the big crater towards Yeruham	A	M	266.8	64.3	7.06	1.44	1.39	1.95	2.55	2.38	3.36	4.03	0.39	0.69	1.35	16.82	1.95	1.87	1.44	1/1	1/1	1/1	2/2	1/1	190	59	6/6	7/7	13	3/3	2	4	9	Large	Trapezoid
R. melanocephalus	HUJ21834 *	10	This study	Israel	The big crater (Makhtesh Gadol)	A	M	290.5	73.8	7.31	1.47	1.81	2.22	2.77	2.32	3.19	4.21	0.42	0.64	1.31	14.78	1.92	1.96	1.34	1/1	1/1	1/1	2/2	1/1	183	61	6/6	7/7	11	3/3	2	5	9	Large	Triangle
R. melanocephalus	HUJ21905		This study	Israel	Oranim college	A	F	NA	99.8	8.25	1.61	2.03	2.83	2.91	2.72	3.57	4.87	0.37	0.88	1.37	12.84	2.31	2.18	1.52	1/1	1/1	1/1	2/2	1/1	NA	58	6/6	7/7	6	3/3	2	4	11	Equal	Trapezoid
R. melanocephalus	HUJ21907		This study	Israel	Lower Galil: Mamlich ridge	A	M	421.7	86.2	9.17	1.64	NA	2.94	3.65	3.06	4.18	4.89	0.63	0.88	1.91	18.17	2.34	NA	NA	1/1	1/1	1/1	-/2	1/1	215	58	-/6	7/7	8	3/3	2	4	11	Large	Trapezoid
R. melanocephalus	HUJ22022		This study	Israel	Daliot junction	A	M	311.5	85.3	8.41	1.23	1.61	2.29	3.19	2.61	3.01	4.43	0.38	0.77	1.63	13.24	2.18	2.19	2.09	1/1	1/1	1/1	2/2	1/1	191	65	6/6	8/8	5	4/4	2	4	10	Large	Trapezoid
R. melanocephalus	HUJ22054 *	6	This study	Israel	Road no. 40, between Qibbuz & Midrasha Sde Boqer	A	F	344.4	86.32	7.46	1.51	NA	NA	3.06	2.18	3.22	4.93	0.52	0.54	1.14	17.32	1.64	NA	NA	1/1	1/1	1/1	1/1	1/1	NA	53	6/6	7/7	13	3/3	2	4	11	Large	Trapezoid
R. melanocephalus	HUJ22055 *	7	This study	Israel	Road #40, between Qibbuz & Midrasha Sde Boqer	A	M	391.2	94.97	8.26	1.23	1.85	2.23	3.58	2.37	4.16	5.19	0.69	0.74	1.72	20.89	NA	2.64	1.83	1/1	1/1	1/1	2/1	1/1	192	62	6/6	7/7	12	3/3	2	4	11	Large	NA
R. melanocephalus	HUJ22056 *	11	This study	Israel	Ascent from the big crater to Yeruham	A	M	355.6	87.37	8.41	1.34	1.73	2.48	2.82	2.46	3.65	5.33	0.63	0.76	1.76	23.24	2.46	2.26	1.58	1/1	2/2	1/1	2/2	1/1	NA	52	0/6	7/7	15	3/3	2	4	9	Large	Trapezoid
R. melanocephalus	HUJ22057 *	12	This study	Israel	Ashalim (turn from road to "Ru'ah Midbar" farm)	A	M	334.5	72.22	7.86	1.37	1.49	2.36	3.29	2.64	3.89	4.95	0.64	0.77	1.88	20.36	2.24	2.11	1.57	1/1	1/1	1/1	1/1	1/1	168	61	6/6	7/7	13	3/3	2	4	11	Large	Trapezoid
R. melanocephalus	HUJ22058 *	8	This study	Israel	Road no. 204, between Haluqim junction and Merhav-Am	A	M	382.6	91.31	9.32	1.62	1.73	2.31	3.18	2.65	4.25	5.49	0.57	1.27	2.11	22.03	2.17	2.48	1.92	1/1	1/1	1/1	-/2	1/1	NA	65	6/6	7/6	11	4/3	2	5	10	Large	Trapezoid
R. melanocephalus	HUJ22103		This study	Israel	Park Canada, 0.5km east of Latrun interchange	A	M	390.4	89.3	8.81	1.59	1.93	2.66	3.46	2.62	3.71	5.25	0.53	0.84	1.75	16.43	2.17	2.03	1.74	1/1	1/1	1/1	2/2	1/1	197	55	6/6	7/7	8	3/3	1	5	11	Equal	Trapezoid
R. melanocephalus	HUJ22245		This study	Israel	Judean Mts: Road 395, near Har Tayasim	A	NA	453.3	94.2	8.93	1.39	NA	2.12	3.48	2.82	3.92	5.57	0.51	0.82	1.61	16.41	2.12	NA	NA	1/1	1/1	1/1	2/2	1/1	188	58	6/6	7/7	8	3/3	2	3	11	Equal	Trapezoid
R. melanocephalus	HUJ3085		This study	Israel	Miqveh Israel	A	M	399.2	84.8	7.91	1.84	1.93	2.23	2.76	2.43	3.43	4.27	0.36	0.39	1.27	16.93	2.09	1.88	1.88	1/1	1/1	1/1	2/2	1/1	206	53	6/6	7/7	10	3/3	2	4	11	Large	Trapezoid
R. melanocephalus	HUJ3089		This study	Israel	Judean Mountains: Kfar Ivri	A	M	396.8	55.1	9.19	1.62	2.19	2.84	2.93	2.65	4.37	5.66	0.75	0.82	1.65	15.94	2.61	2.38	2.06	1/1	1/1	1/1	2/2	1/1	191	29	6/6	7/7	8	3/3	2	5	10	Equal	Trapezoid
R. melanocephalus	HUJ3308		This study	Israel	Maoz	A	M	421.5	91.8	9.42	1.63	2.19	3.04	3.42	3.08	4.16	5.95	0.43	0.89	1.63	22.95	2.94	2.56	1.92	1/1	1/1	1/1	2/2	1/1	229	44	6/6	7/7	13	3/3	2	4	12	Large	Triangle
R. melanocephalus	HUJ3653 *		This study	Israel	Sde Boker	SA	NA	132.5	31.32	6.38	1.27	1.26	1.91	2.48	2.17	3.23	3.51	NA	NA	1.22	13.28	1.42	1.61	1.03	1/1	1/1	1/1	2/2	1/1	201	63	6/6	7/7	13	3/3	1	4	11	Equal	NA
R. melanocephalus	HUJ3951		This study	Israel	Rehovot	A	M	367.3	90.5	8.74	1.64	1.93	2.64	2.46	2.38	3.81	4.98	0.21	1.08	1.47	17.11	2.58	2.11	1.41	1/1	1/1	1/1	2/2	1/1	193	63	6/5	7/7	8	4/4	2	4	11	Equal	Triangle
R. melanocephalus	HUJ3952		This study	Israel	Rehovot	A	F	438.5	94.5	8.18	1.65	2.07	2.58	3.25	2.66	3.69	4.83	0.52	0.53	1.47	14.23	2.09	2.08	1.74	1/1	1/1	1/1	2/2	1/1	211	55	6/6	7/7	6	3/3	2	4	11	Large	Trapezoid
R. melanocephalus	HUJ3954		This study	Israel	Rehovot	A	M	341.2	84.7	7.78	1.55	2.03	2.35	3.07	2.22	3.71	4.62	0.39	0.39	1.48	13.83	2.22	2.11	1.42	1/1	1/1	1/1	2/2	1/1	191	61	6/6	8/8	7	4/4	2	5	10	Large	Trapezoid
R. melanocephalus	HUJ3956		This study	Israel	Rehovot	A	M	384.7	104.7	8.36	1.41	1.56	2.52	3.08	2.47	3.69	4.89	0.51	0.68	1.43	13.12	2.22	2.46	1.78	1/1	1/1	1/1	2/1	1/1	190	68	6/6	7/7	6	3/3	1	4	11	Large	Triangle
R. melanocephalus	HUJ4243		This study	Israel	Jerusalem	A	F	348.5	72.3	7.53	1.52	1.51	2.28	2.83	2.35	3.52	4.58	0.47	0.64	1.42	14.15	1.97	1.98	1.66	1/1	1/1	1/1	2/2	1/1	212	56	6/6	7/7	8	3/3	2	4	9	Equal	Trapezoid
R. melanocephalus	HUJ4327		This study	Israel	Sha'ar Hagai	A	M	353.8	88.8	8.27	1.79	1.82	2.45	3.17	2.62	4.11	4.89	0.48	0.58	1.41	14.13	2.21	2.26	1.63	1/1	1/1	1/1	2/3	1/1	191	57	6/6	7/7	7	3/3	2	4	13	Large	Triangle
R. melanocephalus	HUJ4818		This study	Israel	Rehovot	A	M	382.8	89.7	8.55	1.68	1.98	2.61	3.42	2.58	4.17	5.59	0.37	0.41	1.61	13.42	2.74	2.29	1.71	1/1	1/1	1/1	2/2	1/1	NA	61	6/6	7/7	6	3/3	2	4	11	Equal	Triangle
R. melanocephalus	HUJ8026		This study	Israel	Jerusalem: Qiryat Shmuel	A	F	284.7	71.1	7.15	1.43	1.53	2.45	2.58	2.38	3.41	4.52	0.33	0.58	1.32	14.26	2.21	1.62	1.18	1/1	1/1	1/1	2/2	1/1	199	67	6/6	7/7	10	3/3	2	4	10	Equal	Triangle
R. melanocephalus	HUJ8118		This study	Israel	Jerusalem	A	F	430.3	95.1	8.52	1.41	2.34	2.26	3.31	2.51	4.01	5.01	0.48	0.68	1.48	16.09	2.11	2.38	1.94	1/1	1/1	1/1	2/2	1/1	194	58	6/6	7/7	8	3/3	2	3	10	Large	Trapezoid
R. melanocephalus	HUJ8237		This study	Israel	Ubeidiya	A	NA	274.8	72.3	7.02	1.28	1.65	2.22	2.91	2.11	3.17	4.31	0.39	0.55	1.36	11.04	2.09	1.72	1.28	1/1	1/1	1/1	2/2	1/1	188	67	6/6	7/7	7	3/3	2	4	9	Large	Trapezoid
R. melanocephalus	HUJ8238		This study	Israel	Crossroads Afula-Tiberias-Bet Shean	A	M	404.1	92.3	8.54	1.83	2.29	3.04	3.52	2.93	3.66	5.73	0.54	NA	1.69	16.59	2.77	2.69	1.86	1/1	1/1	1/1	2/2	1/1	191	57	6/6	7/7	8	3/3	2	4	10	Equal	Trapezoid
R. melanocephalus	HUJ8331		This study	Israel	Dir Yasin: Hospital (near Jerusalem)	A	M	316.1	74.7	7.72	1.55	2.11	2.44	2.67	2.31	3.61	4.73	0.38	0.72	1.48	14.76	1.96	1.95	1.62	1/1	1/1	1/1	2/2	1/1	189	53	6/6	7/7	9	3/3	2	4	11	Large	Trapezoid
R. melanocephalus	HUJ8376		This study	Israel	Jerusalem: Giv'at Ram HUJ campus	A	F	257.7	66.1	7.25	1.13	NA	1.95	2.71	2.36	3.63	4.31	0.33	0.75	1.43	13.16	1.78	NA	NA	1/1	1/1	1/1	2/2	1/1	188	61	6/6	8/8	8	4/4	2	4	12	Large	Triangle
R. melanocephalus	HUJ8501		This study	Israel	Jerusalem	A	M	353.1	86.2	7.74	1.57	2.11	2.39	3.16	2.73	3.39	4.89	0.43	0.34	1.64	16.53	2.28	2.18	1.98	1/1	1/1	1/1	1/1	0/0	191	66	6/6	7/7	10	3/3	2	4	11	Equal	Triangle
R. melanocephalus	HUJ8667		This study	Israel	Jerusalem - Jericho road, 12 km from Jericho	A	M	384.3	97.1	8.74	1.73	NA	NA	3.52	2.85	4.15	NA	0.23	0.54	1.48	23.25	NA	NA	NA	1/1	1/1	1/1	2/2	1/1	199	57	6/6	7/7	14	4/4	2	4	9	Large	Triangle
R. melanocephalus	HUJ8856		This study	Egypt	Sinai, Santa Katharina	A	F	462.3	89.8	8.56	1.51	1.66	2.32	2.68	3.06	3.95	5.07	0.46	0.64	1.58	15.01	2.54	2.44	2.44	1/1	1/1	1/1	2/2	0/1	235	62	6/6	8/8	9	4/4	2	4	13	Large	Trapezoid
R. melanocephalus	HUJ8885		This study	Egypt	Sinai, nearr Zuqei Dawid Field School (at Santa Katharina)	A	M	396.2	86.1	8.07	1.73	1.97	2.28	2.94	2.54	NA	3.81	0.53	0.85	1.49	13.53	2.14	NA	NA	1/1	1/1	1/1	1/2	0/1	234	63	6/6	7/8	8	4/4	2	3	13	Large	Trapezoid
R. melanocephalus	HUJ8921 *		This study	Israel	Nahal Gov near the large crater	A	M	324.7	76.8	7.98	1.31	1.68	2.26	2.78	2.39	3.41	4.68	0.56	0.73	1.61	22.15	2.15	2.31	1.58	1/1	2/2	1/1	1/1	1/1	209	60	6/6	7/7	16	4/4	2	4	10	Large	Trapezoid
R. melanocephalus	MHNG1246.077 (LECTOTYPE)		Photographs	Lebanon	Beirut	A	M	NA	NA	NA	NA	NA	NA	NA	NA	NA	NA	NA	NA	NA	NA	NA	NA	NA	1/1	1/1	1/1	2/2	1/1	NA	NA	6/6	7/7	NA	3/3	2	2	10	Large	Trapezoid
R. melanocephalus	MNHN1930.20		This study	Syria		A	M	348.5	72.1	7.81	1.43	NA	2.41	3.08	2.11	3.48	4.64	0.48	0.72	1.35	12.35	2.54	NA	NA	1/1	1/1	1/1	2/2	0/1	214	66	6/6	7/7	6	3/3	2	5	10	Large	Trapezoid
R. melanocephalus	MNHN1953.373		This study	Lebanon	Beirut	A	M	351.1	74.8	6.73	1.23	NA	1.91	2.81	2.19	2.88	3.98	0.51	0.51	1.22	10.77	1.89	NA	NA	1/1	1/1	1/1	2/2	1/1	214	57	6/6	7/7	6	3/3	2	3	9	Equal	Trapezoid
R. melanocephalus	MNHN1953.374		This study	Lebanon	Beirut	A	M	265.8	62.1	6.76	1.11	NA	2.17	2.81	1.99	3.03	3.98	0.62	0.51	1.37	11.49	1.83	NA	NA	1/1	1/1	1/1	2/2	0/0	NA	64	6/6	7/7	7	3/3	2	5	11	Equal	Trapezoid
R. melanocephalus	NMW14625		This study	Syria	Latakia	A	NA	202.3	45.2	6.84	1.51	NA	1.79	2.58	2.11	3.29	3.76	0.61	0.61	1.27	15.07	1.65	NA	NA	1/1	1/1	1/1	2/2	1/1	218	63	6/6	7/7	12	3/3	1	4	11	Large	Triangle
R. melanocephalus	NMW15282-1		This study	Israel	Jerusalem	A	M	232.4	62.7	7.07	1.75	NA	2.18	2.87	2.25	3.17	4.24	NA	0.55	1.37	13.65	2.01	NA	NA	1/1	1/1	1/1	2/2	1/1	189	63	6/6	7/7	8	3/3	2	5	10	Large	Triangle
R. melanocephalus	NMW15282-2		This study	Israel	Jerusalem	SA	NA	171.1	42.4	6.27	1.32	NA	1.88	2.16	1.75	2.99	3.56	0.42	0.83	1.39	10.58	1.69	NA	NA	1/1	1/1	1/1	2/2	1/1	204	66	6/6	7/8	9	4/4	2	4	12	Large	Trapezoid
R. melanocephalus	NMW23773		This study	Lebanon	Becharré	A	M	241.8	58.5	7.32	1.16	NA	2.26	2.58	2.21	3.25	4.16	0.55	0.75	1.36	11.32	2.11	NA	NA	1/1	1/1	1/1	2/2	1/1	181	54	6/6	8/8	7	4/4	1	4	12	Large	Trapezoid
R. melanocephalus	NMW23775-1		This study	Syria		A	M	283.5	74.1	7.84	1.57	NA	2.12	2.95	2.33	4.43	4.39	0.47	0.73	1.63	14.45	2.26	NA	NA	1/1	1/1	1/1	2/2	1/1	205	58	6/6	7/7	5	3/3	2	3	11	Large	Triangle
R. melanocephalus	TAU10542		This study	Israel	Tel Fares	A	M	339.5	74.7	7.78	1.21	1.67	2.38	2.89	2.26	3.35	4.46	0.46	0.64	1.36	12.76	2.24	2.01	1.55	1/1	1/1	1/1	2/2	1/1	200	60	6/6	7/7	6	3/3	2	3	9	Large	Trapezoid
R. melanocephalus	TAU10569		This study	Israel	Kefar Shalem	A	F	398.2	72.1	8.12	1.45	1.76	2.25	3.31	2.26	3.61	4.11	0.21	0.25	1.28	13.02	1.79	2.29	1.34	1/1	1/1	1/1	1/2	1/1	196	44	6/6	7/7	6	3/3	2	5	10	Large	Trapezoid
R. melanocephalus	TAU12328		This study	Israel	Ramla	A	F	493.1	94.9	8.89	1.78	2.32	3.08	3.19	2.82	3.87	4.69	0.68	0.72	1.61	15.92	3.04	2.26	2.05	1/1	1/1	1/1	2/2	1/1	205	56	6/6	7/7	7	3/3	2	4	9	Large	Trapezoid
R. melanocephalus	TAU12494		This study	Egypt	Ras Burqa	A	M	413.4	75.5	8.55	1.53	1.89	2.21	2.88	2.61	3.76	4.58	0.69	0.79	1.67	14.67	2.01	2.19	1.84	1/1	1/1	1/1	2/2	1/1	220	67	6/6	7/8	9	4/4	2	3	13	Large	Trapezoid
R. melanocephalus	TAU12843		This study	Lebanon	Sidon	A	M	464.7	110.5	10.03	2.12	2.21	3.39	3.98	3.06	4.77	6.35	0.38	0.18	1.77	16.42	3.24	2.98	2.36	1/1	1/1	1/1	2/2	0/0	182	62	6/6	6/7	6	3/3	2	4	11	Large	Trapezoid
R. melanocephalus	TAU12899		This study	Israel	Sa'ar HaGay	A	M	446.8	99.1	9.06	1.64	2.01	2.83	3.33	2.83	3.45	4.96	0.31	0.89	1.59	16.22	2.69	2.24	1.88	1/1	1/1	1/1	1/2	1/1	202	64	6/6	7/7	7	3/3	2	4	11	Large	Triangle
R. melanocephalus	TAU13102		This study	Israel	Ya'ar Hulda	A	M	323.1	82.3	7.53	1.65	1.88	2.11	2.82	2.31	3.54	4.52	0.48	0.48	1.51	12.75	2.22	2.21	2.15	1/1	1/1	1/1	2/2	0/1	196	50	6/6	7/7	6	3/3	2	3	11	Large	Trapezoid
R. melanocephalus	TAU13243		This study	Israel	Tubbas	A	NA	377.8	101.2	8.61	1.49	2.17	2.41	3.24	3.03	4.04	5.19	0.61	0.42	1.49	14.19	2.91	2.44	1.88	1/1	1/1	1/1	2/2	1/1	188	NA	6/6	7/7	7	3/3	2	4	10	Large	Trapezoid
R. melanocephalus	TAU13379		This study	Israel	Tubbas	A	M	398.3	102.1	8.92	2.22	1.94	2.59	3.58	3.05	3.96	5.16	NA	0.46	1.46	13.59	2.56	2.87	1.96	1/1	1/1	1/1	2/2	1/1	180	63	6/6	7/7	5	3/3	2	4	10	Large	Triangle
R. melanocephalus	TAU13808		This study	Israel	Ramla	A	M	406.3	99.5	8.44	1.24	2.13	2.52	3.39	2.71	3.69	5.18	0.77	0.54	1.55	15.34	2.16	2.38	2.21	1/1	1/1	1/1	2/2	1/1	192	64	6/6	8/8	8	4/4	2	5	10	Large	Trapezoid
R. melanocephalus	TAU14109		This study	Israel	Bar'am	A	M	428.3	93.1	8.48	1.81	1.98	2.51	2.86	2.45	3.97	4.78	0.46	0.63	1.42	15.99	2.41	2.42	1.68	1/1	1/1	1/1	2/2	1/1	201	56	6/6	7/7	8	3/3	2	5	9	Large	Trapezoid
R. melanocephalus	TAU15268	16	This study	Israel	Gilboa'- Merav	A	F	263.5	NA	6.98	0.99	1.39	1.74	2.68	2.14	3.03	4.02	0.52	0.21	1.13	14.03	1.78	2.03	1.22	1/1	1/1	1/1	2/2	1/1	164	NA	6/6	7/7	9	4/4	2	5	10	Large	Trapezoid
R. melanocephalus	TAU15269	17	This study	Israel	Gilboa'- Merav	A	M	378.3	78.1	7.74	1.75	1.41	1.96	2.98	2.46	3.57	4.24	0.41	0.64	1.36	13.71	2.02	2.06	1.63	1/1	1/1	1/1	2/2	1/1	198	59	6/6	8/7	8	4/4	2	4	13	Large	Trapezoid
R. melanocephalus	TAU15711		This study	Israel	Merav	A	M	311.8	82.1	7.76	1.54	1.73	2.38	3.02	2.57	3.68	4.97	0.63	0.48	1.51	17.83	2.31	2.49	1.86	1/1	1/1	1/1	2/2	1/1	187	56	6/6	7/7	11	3/3	1	4	11	Large	Trapezoid
R. melanocephalus	TAU15733		This study	Israel	Ma`Ale Merav	A	F	326.8	49.8	8.43	1.49	1.97	2.25	3.17	2.54	3.68	4.64	0.22	0.66	1.44	17.05	2.27	2.21	1.55	1/1	1/1	1/1	2/2	1/1	167	29	6/6	7/7	10	4/4	2	4	10	Large	Triangle
R. melanocephalus	TAU15747		This study	Israel	Malkishua road	A	M	422.4	106.4	8.84	1.78	1.82	2.83	3.02	3.11	3.77	4.86	0.12	0.62	1.51	19.31	2.38	2.38	2.37	1/1	1/1	1/1	2/2	1/1	211	66	6/6	7/7	11	4/4	NA	NA	11	Large	Triangle
R. melanocephalus	TAU15917		This study	Israel	Road no. 98	A	F	391.5	84.7	7.79	1.81	2.04	2.14	2.63	2.15	3.02	4.61	0.11	0.63	1.17	14.13	2.11	2.26	1.63	1/1	1/1	1/1	2/2	1/1	196	59	6/6	7/7	8	4/4	2	4	11	Large	Triangle
R. melanocephalus	TAU16336	15	This study	Israel	Kefar Ha-Oranim	A	M	344.8	88.9	8.43	1.52	1.56	2.78	3.32	2.77	4.07	4.81	0.48	0.49	1.52	13.91	2.16	2.26	1.62	1/1	1/1	1/1	1/1	1/1	188	65	6/6	7/7	7	4/4	2	4	10	Large	Trapezoid
R. melanocephalus	TAU16340	21	This study	Israel	Montfort - upper Galilee	A	F	299.3	60.1	7.37	1.32	1.51	2.07	2.61	2.29	3.49	4.13	0.55	0.67	1.18	11.64	1.89	1.99	1.89	1/1	1/1	1/1	1/1	1/1	194	42	6/6	NA	5	3/3	1	4	11	Large	Trapezoid
R. melanocephalus	TAU16443		This study	Israel	Near Ma`ale Efrayim	A	F	258.1	54.8	9.52	1.26	1.58	1.78	2.65	2.03	3.18	3.75	0.38	0.48	1.29	14.82	1.56	1.62	1.21	1/1	1/1	1/1	2/2	1/1	197	62	6/6	7/8	12	3/3	2	4	10	Large	Trapezoid
R. melanocephalus	TAU16468	18	This study	Israel	Gilboa'- Merav	A	M	284.5	73.1	7.62	1.43	1.72	2.41	2.62	2.47	3.44	4.64	0.58	0.46	1.43	16.14	1.98	2.15	1.68	1/1	1/1	1/1	2/2	1/1	181	63	6/6	7/7	10	3/3	2	4	10	Large	Trapezoid
R. melanocephalus	TAU16575	19	This study	Israel	Shemurat Nahal Tanninim, Ma'agan Michael	A	M	NA	96.4	8.91	1.51	1.81	2.15	3.23	2.56	3.89	4.71	0.36	0.69	1.36	15.48	2.01	2.51	1.82	1/1	1/1	1/1	1/1	1/1	NA	57	6/6	7/7	5	3/3	2	4	11	Large	Triangle
R. melanocephalus	TAU16622	20	This study	Israel	Nahal Oren, Karmel	A	M	305.5	80.8	8.55	1.38	1.54	2.35	3.02	2.59	3.86	5.51	0.41	0.47	1.38	13.84	1.84	1.96	2.01	1/1	1/1	1/1	2/2	1/1	183	56	6/6	7/7	6	3/3	2	5	13	Large	Trapezoid
R. melanocephalus	TAU16871		This study	Israel	Jerusalem	A	F	412.2	80.1	8.06	1.58	1.56	2.22	2.93	2.57	3.73	3.95	0.43	0.51	1.45	14.21	2.29	2.12	1.93	1/1	1/1	1/1	2/2	1/1	207	50	6/5	7/7	7	3/3	2	4	NA	Large	Trapezoid
R. melanocephalus	TAU1739		This study	Israel	Ashqelon	A	M	398.7	97.3	8.16	1.46	2.03	2.41	2.99	2.39	3.65	4.56	0.55	0.51	1.47	16.12	2.26	2.16	1.81	1/1	2/2	1/1	2/2	1/1	NA	61	6/6	7/7	8	3/3	2	5	12	Large	Trapezoid
R. melanocephalus	TAU1752		This study	Israel	Ashqelon	A	M	404.2	105.7	8.82	1.81	2.15	2.54	3.28	2.55	4.05	5.14	0.54	0.58	1.61	15.98	2.65	2.23	1.93	1/1	1/1	1/1	2/2	1/1	199	55	6/6	7/7	7	3/3	2	4	12	Large	Trapezoid
R. melanocephalus	TAU207		This study	Israel	Herzliyya	A	F	381.5	77.4	7.66	1.25	1.96	2.38	2.45	2.25	3.42	4.55	0.42	0.66	1.38	14.68	2.28	1.78	1.44	1/1	1/1	1/1	2/2	1/1	199	55	6/6	8/8	9	4/4	2	5	9	Large	Trapezoid
R. melanocephalus	TAU208		This study	Israel	Qalqilya	A	M	425.1	100.9	9.05	1.86	2.4	2.82	3.26	2.98	4.09	5.87	0.34	0.73	1.69	15.78	2.61	3.06	1.96	1/1	1/1	1/1	2/2	0/1	189	63	6/6	7/7	7	3/3	2	5	11	Large	Trapezoid
R. melanocephalus	TAU209		This study	Israel	Allonim	A	F	411.3	87.7	8.41	1.54	2.18	2.35	2.82	2.45	3.77	5.33	0.52	0.69	1.41	13.08	2.51	2.41	1.95	1/1	1/1	1/1	2/1	0/1	203	57	6/6	7/7	7	3/3	1	3	10	Large	Trapezoid
R. melanocephalus	TAU210		This study	Israel	Allonim	A	M	334.8	83.2	8.11	1.48	1.74	2.62	3.16	2.55	3.61	4.68	0.28	0.31	1.46	16.07	2.27	1.88	2.07	1/1	1/1	1/1	2/2	1/1	189	62	6/6	7/7	8	3/3	2	4	9	Large	Trapezoid
R. melanocephalus	TAU211		This study	Israel	Tiv'on	A	M	314.8	79.5	7.56	1.31	1.95	2.21	2.87	2.37	3.51	4.41	0.61	0.72	1.49	13.31	2.19	2.1	1.74	1/1	1/1	1/1	2/2	1/1	198	57	6/6	7/7	6	3/3	2	4	10	Large	Trapezoid
R. melanocephalus	TAU212		This study	Israel	Bet Alfa	A	F	399.1	84.7	7.93	1.44	1.81	2.43	2.97	2.41	3.55	4.91	0.47	0.64	1.54	14.41	2.26	2.05	1.73	1/1	1/1	1/1	2/2	1/1	193	64	6/6	7/7	8	3/3	1	4	11	Large	Trapezoid
R. melanocephalus	TAU3013		This study	Israel	Tiv'on	A	M	374.8	92.1	8.31	1.41	2.25	2.42	2.65	2.61	3.82	5.02	0.55	0.77	1.48	15.87	2.66	2.32	2.35	1/1	1/1	1/1	1/2	1/1	193	53	6/6	7/7	8	3/3	2	5	11	Large	Trapezoid
R. melanocephalus	TAU4622		This study	Israel	Kefar Menachem	A	F	499.2	105.3	8.38	1.43	1.68	2.09	3.09	2.56	3.38	4.57	0.85	0.49	1.62	16.21	2.49	2.12	1.86	1/1	1/1	1/1	2/2	1/1	185	62	6/6	7/7	7	4/4	2	3	10	Large	Trapezoid
R. melanocephalus	TAU4911		This study	Israel	Peth Tiqwa	A	F	384.7	88.1	7.38	1.34	1.72	2.11	2.92	2.37	3.13	3.97	0.43	0.44	1.33	13.21	2.11	1.76	1.71	1/1	1/1	1/1	2/2	1/1	195	68	6/6	7/7	7	3/3	2	4	8	Large	Trapezoid
R. melanocephalus	TAU6082		This study	Israel	Adamit	A	F	436.8	85.8	8.48	1.35	2.01	2.61	3.09	2.74	3.72	4.62	0.59	0.35	1.52	12.98	2.32	2.35	1.85	1/1	1/1	1/1	2/2	1/1	198	64	6/6	7/7	6	3/3	2	5	11	Large	Trapezoid
R. melanocephalus	TAU6103		This study	Israel	Bet Alfa	A	M	412.5	96.7	8.73	1.81	1.99	2.39	3.51	2.69	3.87	5.05	0.27	0.48	1.78	19.15	2.46	2.57	1.98	1/1	1/1	1/1	1/2	1/1	191	64	6/6	8/7	9	3/3	2	4	11	Large	Triangle
R. melanocephalus	TAU7868		This study	Israel	Golan	A	F	378.7	60.4	6.78	1.34	1.38	2.11	2.17	1.95	3.15	3.68	0.25	0.73	1.02	11.05	1.84	1.55	1.41	1/1	1/1	1/1	2/2	1/1	219	54	6/6	7/7	6	3/3	2	5	10	Large	Triangle
R. melanocephalus	TAU9971		This study	Israel	Revadim	A	M	390.5	94.1	8.54	1.37	1.89	2.65	2.95	2.48	3.66	4.98	0.59	0.82	1.68	14.05	2.64	2.32	1.95	1/1	1/1	1/1	2/2	1/1	184	60	6/6	7/7	6	3/3	2	4	11	Large	Trapezoid
R. melanocephalus	ZDEU206/2006-1		Avci et al. (2008)	Turkey	Sofular Village, Harbiye, Hatay	A	M	234.9	51.04	7.44	NA	1.6	2.5	2.62	2.2	NA	3.7	NA	NA	1.46	NA	2.52	1.52	NA	1/1	1/1	1/1	2/2	NA	180	55	6/6	7/7	NA	3/3	1	NA	9	NA	NA
R. melanocephalus	ZDEU206/2006-2	24	Avci et al. (2008)	Turkey	Sofular Village, Harbiye, Hatay	SA	M	189.48	39.26	6.52	NA	1.44	2.02	2.4	2.16	NA	3.26	NA	NA	1.36	NA	2.02	1.4	NA	1/1	1/1	1/1	2/2	NA	184	54	6/6	7/7	NA	3/3	1	NA	11	NA	NA
R. melanocephalus	ZDEU207/2006	25	Avci et al. (2008)	Turkey	Kuruyer Village, Hatay	A	F	301.42	61.02	7.36	NA	1.62	2.5	2.7	2.6	NA	4.46	NA	NA	1.7	NA	2.62	1.74	1.32	1/1	1/1	1/2	2/2	NA	198	53	5/6	8/8	NA	3/4	1	NA	11	NA	NA
R. melanocephalus	ZDEU252/2007		Avci et al. (2008)	Turkey	Güveççi Village, Yayladağı, Hatay	SA	M	214.68	47.6	6.42	NA	1.36	2.1	2.5	2.1	NA	4.04	NA	NA	1.2	NA	2.36	1.6	1.28	1/1	1/1	1/1	1/2	NA	184	56	6/6	7/7	NA	3/4	1	NA	11	NA	NA
R. melanocephalus	ZFMK31622		Franzen & Bischoff (1995) + Photographs	Syria		A	F	142	26	NA	NA	NA	NA	NA	NA	NA	NA	NA	NA	NA	NA	NA	NA	NA	1/1	1/1	1/1	1/1	1/1	208	58	6/6	7/7	9	3/3	1	4	10	Large	Trapezoid
R. melanocephalus	ZFMK54054		Franzen & Bischoff (1995) + Photographs	Jordan	Petra	SA	NA	148	33	NA	NA	NA	NA	NA	NA	NA	NA	NA	NA	NA	NA	NA	NA	NA	1/1	1/2	1/1	1/1	1/1	218	66	6/6	7/7	8	4/4	2	6	12	Large	Trapezoid
R. melanocephalus	ZFMK56875		Franzen & Bischoff (1995) + Photographs	Turkey	20 km south of Harbiye, Hatay	A	NA	305	66	NA	NA	NA	NA	NA	NA	NA	NA	NA	NA	NA	NA	NA	NA	NA	1/1	1/1	1/1	1/1	0/0	201	57	6/6	8/7	6	3/3	2	5	9	Equal	Triangle
R. melanocephalus	ZISP6707		Darevsky (1970) + Photographs	Syria		A	M	321	84	NA	NA	NA	NA	NA	NA	NA	NA	NA	NA	NA	NA	NA	NA	NA	1/1	1/1	1/1	1/1	1/1	190	64	6/6	7/7	5	3/3	2	5	11	Large	Triangle
R. melanocephalus	ZISP8977		Darevsky (1970) + Photographs	Jordan	Karak	A	M	305	77	NA	NA	NA	NA	NA	NA	NA	NA	NA	NA	NA	NA	NA	NA	NA	1/1	1/1	1/1	1/1	1/1	192	64	6/6	7/7	7	3/3	2	4	9	Large	Trapezoid
R. melanocephalus	ZMHRU2007/69	23	This study	Syria	Tartus	A	F	278	51	7.63	NA	1.56	1.78	3.02	2.28	NA	4.36	NA	NA	1.53	NA	2.61	2.09	1.54	1/1	1/1	1/1	2/2	1/1	185	45	6/6	7/7	NA	NA	1	4	11	NA	NA
R. satunini	CAS228723	29	Franzen & Bischoff (1995) + Photographs	Iran	(by air) 40 km north-west of Kermanshah, 5 km west of Lalabad Village	A	NA	NA	NA	NA	NA	NA	NA	NA	NA	NA	NA	NA	NA	NA	NA	NA	NA	NA	1/1	1/1	1/1	1/1	1/1	NA	NA	7/7	8/8	NA	4/4	2	4	12	Large	Triangle
R. satunini	FMNH74605		Reed & Marx (1959)	Iraq	Kirkuk Liwa, Chemchemal Centre Nahiya, Mound of Jermo	A	F	298	55	NA	NA	NA	NA	NA	NA	NA	NA	NA	NA	NA	NA	NA	NA	NA	1/1	1/1	1/1	NA	1/1	220	53	7/7	8/8	NA	3/3	2	NA	NA	enlarged	triangle
R. satunini	MCZ56877		Reed & Marx (1959)	Iran	Khuzistan, south of Dizful, Shalgahi	J	F	139	27	NA	NA	NA	NA	NA	NA	NA	NA	NA	NA	NA	NA	NA	NA	NA	1/1	1/1	1/1	NA	NA	226	59	7/7	8/8	NA	4/4	NA	NA	NA	enlarged	NA
R. satunini	NMW19561		This study	Turkey	Cizre	SA	F	159	31	6.07	1.07	NA	1.65	2.12	1.84	2.89	3.41	0.53	0.72	0.96	NA	1.65	NA	NA	1/1	1/1	1/1	1/1	1/1	220	59	7/7	8/8	NA	4/4	1	4	12	Large	Trapezoid
R. satunini	ZDEU125/2006	26	Avci et al. (2007)	Turkey	Nurdagi, Gaziantep	A	M	341.48	68.36	7.9	NA	1.78	2.1	2.62	2.16	NA	3.28	NA	NA	1.66	NA	2.28	2	1.3	1/1	1/1	1/1	1/1	1/1	205	58	7/8	8/9	NA	4/4	1	NA	10	NA	triangle
R. satunini	ZDEU163/2005		Avci et al. (2007)	Turkey	4 km west of §ambayat, Adiyaman	A	M	279.28	58.46	6.84	NA	1.84	2.18	2.48	2.2	NA	3.38	NA	NA	1.2	NA	2	2	1.16	1/1	1/1	1/1	1/1	1/1	201	58	8/7	9/8	NA	4/3	1	NA	12	NA	trapezoid
R. satunini	ZDEU169/2005		Avci et al. (2007)	Turkey	3 km south of Çelikhan, Adiyaman	SA	NA	193.56	43.36	6.22	NA	1.82	2.26	2.18	2	NA	2.86	NA	NA	1.32	NA	1.68	1.5	0.82	1/1	1/1	1/1	2/2	1/1	204	64	7/7	9/8	NA	4/3	1	NA	10	NA	trapezoid
R. satunini	ZDEU181/2005		Avci et al. (2007)	Turkey	Cüngüs, Diyarbakir	A	F	276.8	56.92	6.78	NA	1.66	2.46	2.02	2.18	NA	3.3	NA	NA	1.3	NA	2.2	1.24	0.88	1/1	1/1	1/1	1/1	1/1	215	59	7/7	8/8	NA	3/3	1	NA	12	NA	triangle
R. satunini	ZFMK31621		Franzen & Bischoff (1995) + Photographs	Iran	Fars	J	M	134	28	NA	NA	NA	NA	NA	NA	NA	NA	NA	NA	NA	NA	NA	NA	NA	1/1	1/1	1/1	1/1	1/1	202	61	7/7	8/8	NA	4/4	2	3	11	Large	Trapezoid
R. satunini	ZISP13408		Darevsky (1970)	Azerbaijan	Ordubat	SA	M	198	36	NA	NA	NA	NA	NA	NA	NA	NA	NA	NA	NA	NA	NA	NA	NA	1/1	1/1	1/1	1/1	NA	206	64	7/7	NA	NA	NA	NA	NA	NA	NA	NA
R. satunini	ZISP17098		Darevsky (1970) + Photographs	Azerbaijan	Nakhichevan, Ustupi	A	F	310	68	8.55	1.75	2.11	2.61	2.8	2.15	3.9	4.45	0.35	1.05	1.27	NA	NA	1.98	1.75	1/1	1/1	1/1	2/2	1/1	225	64	7/7	8/8	NA	3/3	2	5	13	Large	Triangle
R. satunini	ZISP19170		Photographs	Armenia	Asmi	SA	NA	NA	NA	NA	NA	NA	NA	NA	NA	NA	NA	NA	NA	NA	NA	NA	NA	NA	1/1	1/1	1/1	2/2	1/1	NA	NA	7/7	8/8	NA	4/4	3	5	10	Large	Triangle
R. satunini	ZISP23011		Photographs	Armenia	Khosrov reserve	A	M	NA	NA	7.58	2.21	1.87	2.05	2.75	2.03	3.75	4.47	0.32	0.68	1.05	NA	NA	2.08	1.78	1/1	1/1	1/1	1/2	1/1	NA	NA	7/7	8/8	NA	4/4	1	4	12	Large	Trapezoid
R. satunini	ZISP9343 (HOLOTYPE)		Nikolsky (1899) + Photographs	Armenia	vicinity of Megri	SA	F	185	31	NA	NA	NA	NA	NA	NA	NA	NA	NA	NA	NA	NA	NA	NA	NA	1/1	1/1	1/1	1/2	0/1	223	61	7/7	8/8	NA	4/4	2	NA	NA	Large	Trapezoid
R. satunini	ZMHRU2015/0	27	This study	Turkey	Artuklu, Mardin	A	NA	296	61	6.95	NA	1.42	1.91	2.24	1.92	NA	3.78	NA	NA	1.31	NA	2.47	1.84	1.03	1/1	1/1	1/1	1/1	1/1	219	59	7/7	8/8	NA	4/4	2	8	13	Large	Triangle
